# Supplementary material
Source: MDPI journal article supplement (https://www.mdpi.com/2077-1312/12/4/674)
Supplement: s1 [file s1]

## Supplementary Materials:

# Diversity and Distribution of Mesozooplankton in the Coastal Southwestern Mediterranean Alboran Sea, during Summer: What Are the Driving Factors?

Mohamed Reda Benallal <sup>1,2,\*</sup>, Ahmed Errhif <sup>1</sup>, Laila Somoue <sup>2</sup>, Mohamed Laabir <sup>3</sup>, Hervé Demarcq <sup>4</sup>, Mohammed Idrissi <sup>2</sup>, Aziz Agouzouk <sup>2</sup>, Yassine Goliat <sup>1,2</sup>, Hajar Idmoussi <sup>1,2</sup>, Ahmed Makaoui <sup>2</sup> and Omar Ettahiri <sup>2</sup>

<sup>1</sup> Health and Environment Laboratory, Ain Chock Faculty of Sciences, Hassan II University of Casablanca, Morocco, B.P. 5366, Casablanca 20100, Morocco; aerrhif@gmail.com (A.E.); yassine.goliat@gmail.com (Y.G.); hajar.idmoussi@gmail.com (H.I.)

<sup>2</sup> National Institute of Fisheries Research, Avenue Sidi Abderrahmane, B.P. 20100, Ain Diab Casablanca, Casablanca 20180, Morocco; lailasomoue@gmail.com (L.S.); idrissi@inrh.ma (M.I.); oceanosaad@gmail.com (A.A.); makaoui@inrh.ma (A.M.); ettahiri@inrh.ma (O.E.)

<sup>3</sup> MARBEC, University of Montpellier, CNRS, Ifremer, IRD, 34095 Montpellier, France; mohamed.laabir@umontpellier.fr

<sup>4</sup> MARBEC, University of Montpellier, CNRS, Ifremer, IRD, 34200 Sète, France; herve.demarcq@ird.fr

\* Correspondence: mohamedredabenallal@gmail.com

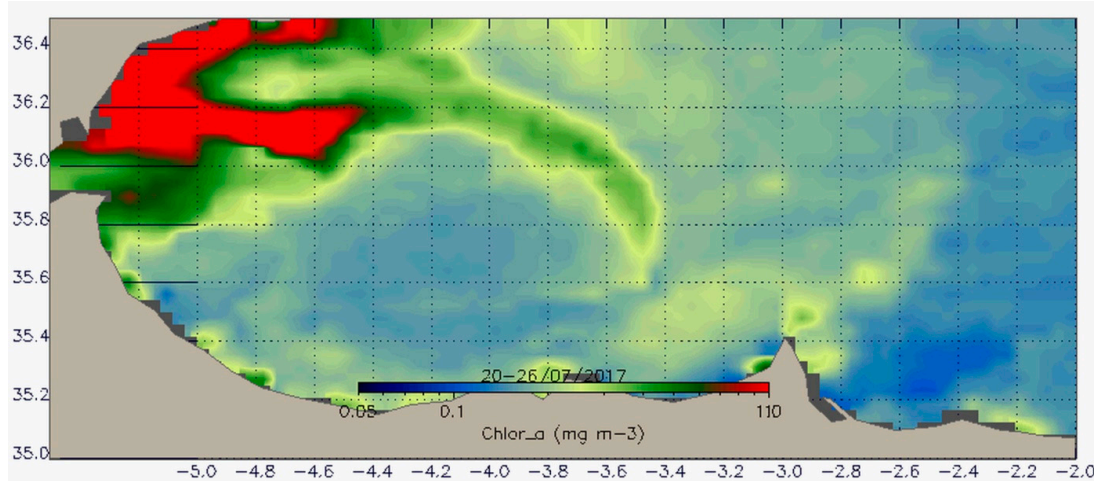

Figure S1. Chlorophyll-a concentration from the MODIS sensor during the same survey period.

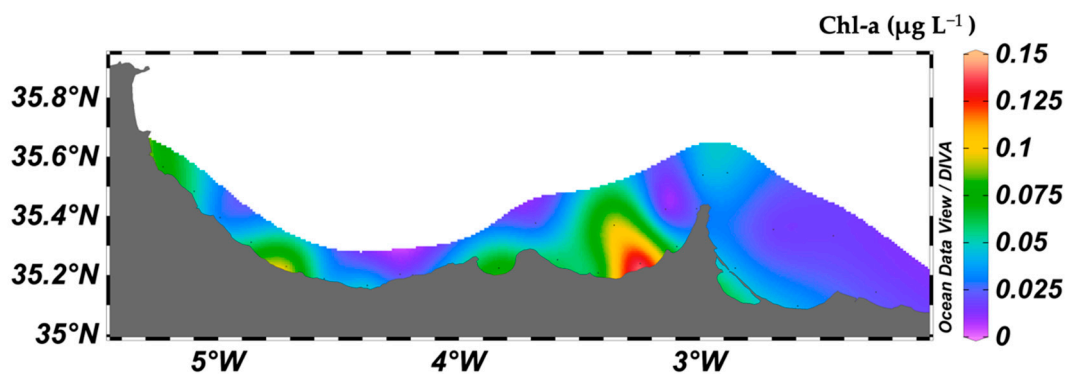

Figure S2. Distribution of bottom chlorophyll-a ( $\mu\text{g L}^{-1}$ ).

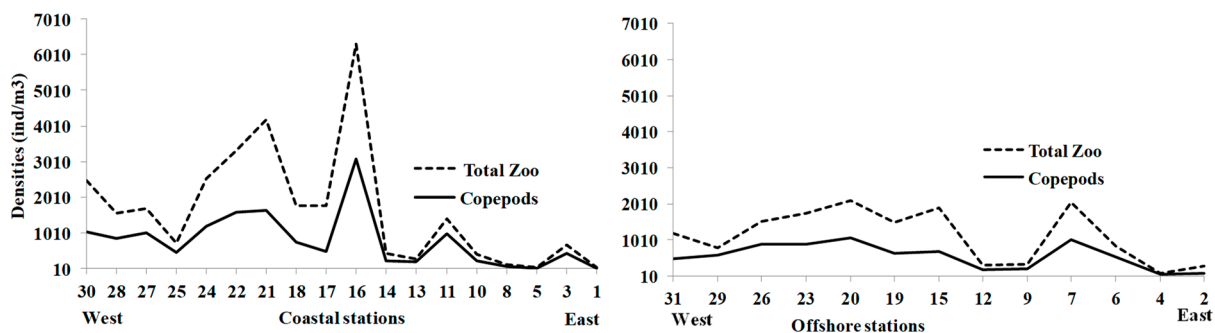

Figure S3. Longitudinal comparison along the Moroccan Mediterranean coast of the mesozooplankton and copepod total abundance ( $\text{ind. m}^{-3}$ ) for coastal and offshore stations.

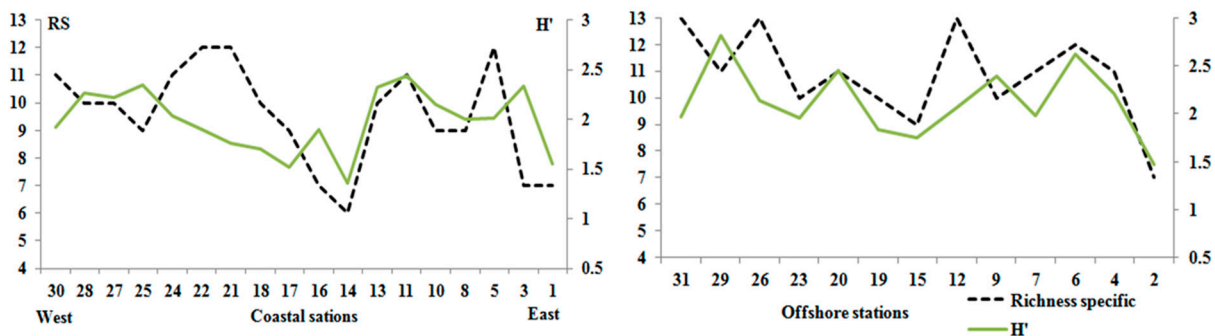

Figure S4. Longitudinal comparison along the Moroccan Mediterranean coast of the species richness (RS) and the Shannon index ( $H'$ ) for coastal and offshore stations.
